# Full title

Sexual risk-taking behavior amongst emerging adults in Africa: a systematic review and meta-analysis

## Short title

Sexual behavior amongst emerging adults in Africa: systematic review

## Authors

Stevenson K. Chea<sup>1, 2, 3\*</sup>, Vincent A. Kagonya<sup>4</sup>, Osman Abdullahi<sup>5</sup>, Amina A. Abubakar<sup>4, 5, 6, 7</sup>, Souheila Abbeddou<sup>3</sup>, Kristien Michielsens<sup>2</sup> and Amin S. Hassan<sup>4, 5</sup>

## Affiliations

<sup>1</sup>Department of Nursing Sciences, School of Health and Human Sciences, Pwani University, Kilifi, Kenya

<sup>2</sup>International Centre for Reproductive Health, Department of Public Health and Primary Care, Faculty of Medicine and Health Sciences, Ghent University, Ghent, Belgium

<sup>3</sup>Public Health Nutrition Unit, Department of Public Health and Primary Care, Faculty of Medicine and Health Sciences, Ghent University, Ghent, Belgium

<sup>4</sup>Centre for Geographic Medicine Research, Kenya Medical Research Institute, Kilifi, Kenya

<sup>5</sup>Department of Public Health, School of Health and Human Sciences, Pwani University, Kilifi, Kenya

<sup>6</sup>Department of Psychiatry, University of Oxford, Oxford, United Kingdom

<sup>7</sup>Institute for Human Development, Aga Khan University, Nairobi, Kenya

## \*Corresponding Author

E-mail: [cheastevenson@gmail.com](mailto:cheastevenson@gmail.com) (SC)

ORCHID: 0000-0002-8096-711X

NOTE: This preprint reports new research that has not been certified by peer review and should not be used to guide clinical practice.

## Abstract

## Background

Incidence of HIV and other sexually transmitted infections (STIs) among emerging adults (EmA) is high in some African settings. Estimates on sexual risk-taking behavior (SRTB) among EmA is varied in literature, which presents a challenge when designing targeted interventions. We aimed to review and summarize literature on prevalence and risk factors of SRTB among EmA in Africa.

## Methods

A search for studies published in PubMed, Embase and Psych Info involving EmA (18 – 25 years), conducted in Africa and reporting one or more SRTB was done. Pooled prevalence estimates were summarized using forest plots. Heterogeneity in SRTB was explored by sex, geographic region, year of publication and outcome definition. Risk factors were synthesized using a modified socio-ecological model.

## Results

Overall, 117 studies were analyzed. Non-condom use had the highest pooled prevalence (46.0% [95% CI: 14.0-51.0]), followed by study-defined SRTB (37.0% [95% CI: 23.0 -51.0]), concurrency (35.0% [95% CI: 19.0-53.0]), multiple sex partnerships (30.0% [95% CI: 24.0-37.0]), younger age at sexual debut (25.0% [95% CI: 19.0- 31.0]), age disparate relationships (24.0% [95% CI: 17.0-32.0]) and transactional sex (17.0% [95% CI: 11.0-24.0]). In four of the seven outcomes, heterogeneity was partially explained by sex, with female participants having higher pooled prevalence estimates compared to their male counterparts. In four of the seven outcomes, alcohol/drug use was the most common risk factor.

## Conclusions

48 SRTB was common among EmA and differentially higher in emerging female adults. Non-  
 49 condom use had the highest pooled prevalence, which may contribute to the propagation of  
 50 HIV and other STIs in this population. Interventions targeting emerging female adults and  
 51 alcohol/drug use may reduce SRTB, which may in-turn mitigate propagation of HIV and other  
 52 STIs among EmA in Africa.

53

54 **Key words:** Sexual risk-taking, emerging adults

## Background

HIV-1 transmission in the general population in sub-Saharan Africa (sSA) is estimated to have declined from 1.4 million in 2010 to 800,000 in 2019 [1]. However, new HIV-1 infections among young adults continue to raise concerns as they are estimated to contribute 31% of new infections in sSA in 2019 [1]. Earlier studies from Mozambique, Uganda, Tanzania and Zimbabwe indicate that sexual risk-taking behavior (SRTB) is highly prevalent among EmA [2-6]. Literature suggests a positive linear association between SRTB and STIs, including HIV [7], which may partially explain the high rates of STIs, including HIV-1 infection among EmA in Africa.

Emerging adulthood is a relatively new concept of development for the period from late teens through the early twenties, with a focus on ages 18-25 years [8]. During this time, experimentation that began in adolescence intensifies [9]. Emerging adulthood is a distinct period demographically [10], subjectively and in terms of identity explorations [9]. Demographically, the transition from teenage hood into emerging adulthood is characterized with a move from parents' houses to a semi-autonomous life [11]. Subjectively, EmA feel they have left adolescence but have not yet completely transitioned into adulthood [12]. Lastly, emerging adulthood is the period of life that offers most opportunity for identity explorations in the areas of work and relationships [13]. Identity formation involves trying out various life possibilities and gradually moving towards making enduring decisions and commitments. Romantic relationships at this age often include sexual intercourse [14], which likely exposes EmA to SRTB.

Another notable characteristic in emerging adulthood is SRTB. Evidence from the USA suggests that the prevalence of SRTB was higher during emerging adulthood (31.8%) compared to adolescence (21.6%) [15]. Literature on SRTB amongst EmA suggests that outcomes remain varied in estimates. For example, a recent systematic review has shown that

80 SRTB among youth in Africa range from 3% in Zimbabwe to 89% in Uganda [16]. The review  
 81 however did not focus on EmA only as it included studies that recruited HIV-1 infected  
 82 individuals aged 10-24 years. In this review, the most common SRTB was non-condom use at  
 83 88.7% [16]. Another systematic review mainly focused on adolescents and reported prevalence  
 84 of non-condom use ranging from 35-55% [17]. Importantly and in both studies, the potential  
 85 explanation for the wide variation in SRTB prevalence estimates was not explored. Variations  
 86 in SRTB estimates present a challenge in the design and implementation of effective and  
 87 targeted interventions. We aimed to systematically review and summarize comparable  
 88 literature on prevalence and risk factors of SRTB among EmA in Africa.

## Methods

### Search strategy

Literature published on PubMed, Embase, and Psych Info up to April 2020 was searched. The search was done using relevant key concepts and search terms based on the Population, Exposure, Comparison, Outcome and Setting (PECOS) approach (File S1). To identify articles that may have been missed in the search, snowballing was used to search reference lists of all eligible articles. The preferred reporting items for systematic reviews and meta-analyses (PRISMA) guidelines were used in reporting the methods and findings [18, 19]. The protocol for this systematic review was registered on PROSPERO (registration number CRD42020150075).

### Eligibility

Eligibility criteria for inclusion of studies in the review were: (i) participants 18-25 years old (or mean and/or median age within 18-25 years, or outcome data reported in an eligible sub-population), (ii) quantified any SRTB assessed as a primary or secondary outcome, (iii) conducted in Africa, (iv) observational studies, and (v) published in English. Two investigators (SC and VAK) screened all the articles by title/abstract then by full text for eligibility. Disagreements on eligibility were settled through consultation and consensus building.

### Outcome definition

The primary outcome was SRTB. Studies reporting one or more of six different variants or sub-variants of SRTB including: non-condom use, multiple sex partnerships, transactional sex, younger age at sexual debut, concurrency and age disparate relationships were assessed. In cases where studies reported two or more SRTBs combined as one outcome, we reported this

separately as “study-defined SRTB”. Thus, and all-together, seven SRTB outcomes were assessed.

## **Data extraction**

Eligible articles were reviewed and relevant data extracted. These included author details, year of publication, sample size, study design, study setting, participants’ sex and age. Outcome-specific data included definition of the outcome, prevalence estimate, all the risk factors that were assessed and risk factors reported to be significantly associated with the outcome. In studies that reported different variants of an outcome, prevalence estimates for both the outcome and its variants were extracted only if the outcome definitions differed based on the recall period (e.g. main outcome [non-condom use in the past one year]; variant [non-condom use in the past 6 months]). Where the recall period was similar or not specified (e.g. main outcome [non-condom use with casual partner]; variant [non-condom use with regular partner]), only the prevalence estimate of the main outcome, as defined in the study objectives, was extracted. In studies where outcome data were stratified by sex, estimates were collapsed to obtain an overall estimate. Similarly, for such studies, factors reported to be significantly associated with reported outcomes were extracted only if they were significant in both sexes with a similar direction of association. This approach was taken to ensure consistency in reporting of risk factors. Data abstraction was independently conducted by two investigators (SC and VK) and a comparison of results done. Disagreements were settled through consultations and consensus building.

## **Quality assessment**

The quality assessment tool for systematic reviews of observational studies (QATSO) was used to appraise the quality of eligible studies. The QATSO tool has been shown to be practical,

simple, and easy when reviewing observational studies in the context of health risk outcomes and has been shown to have good inter-rater reliability [20]. During data extraction, each study that met the inclusion criteria was reviewed against the five risk-of-bias items that check on external validity (1 item), bias (1 item), reporting (2 items), and confounding (1 item). Items were coded and scored as 1 if the condition was met and 0 if not. The summed score was then divided by the total number of all applicable items. Next, the resultant score was converted to a percentage that guided the generation of a ‘traffic light’ rating of a study as “Poor” (less than 33%), “Satisfactory” (33-66%), or “Good” (greater than 66%). All eligible studies regardless of quality score were included in analysis.

## **Data analysis**

Prevalence estimates from the seven pre-determined SRTB outcomes were summarized and presented using forest plots. Heterogeneity in the prevalence estimates was further explored by sex, geographical region where studies were conducted, year of publication, and outcome definition. Weighted individual proportions and their variances were first computed. Since proportional data from observational studies is often skewed [21], observed proportions from individual studies were then transformed using the double arcsine transformation [22]. Secondly, the transformed proportions and their sampling variances were pooled to generate summary proportions. To consider within and between study variances and to allow generalizability of the findings, random effect models were used to calculate the summary proportions [23]. Random effects modeling was estimated using the DerSimonian and Laird method. In this method, the summary proportion was estimated as the weighted average of the observed proportion of individual studies where the weighting for each study is the inverse of the total variance of a study [24]. In this case, total variance was the sum of within study and between study variance. Finally, the transformed proportions were converted back and pooled



163 prevalence estimates reported. Analysis was performed in Stata 15.0 (StataCorp.2017. Stata  
164 Statistical Software: Release 15. College Station, TX: StataCorp LLC. 2019).

165 Risk factors of each SRTB outcome were synthesized, summarized, and grouped into five  
166 thematic categories based on a modified socio-ecological model [25, 26]: (i) Socio-  
167 demographic, (ii) relationship and behavioral, (iii) knowledge, attitude and beliefs, (iv) family  
168 and community and (v) mental and physical health factors. For studies that reported variants  
169 of the outcomes, only risk factors from the main SRTB outcome were included in the synthesis.

## Results

### Characteristics of eligible studies

From the three databases, we obtained a combined 4,280 hits (PubMed [n=720], Psych info [n=1,323] and Embase [n=2,237]) of which 1,139 were duplicates. A further 3,024 articles were also excluded. The remaining 117 articles met all eligibility criteria and were included in the analysis (Fig 1). Overall, eligible studies comprised 163,251 EmA, with sample sizes ranging from 50 to 27,757 participants. In summary, majority of eligible studies were published after 2010 (n=89 [76.1%]), used a cross sectional study design (n=109 [93.2%]), had a sample size of less than 1000 participants (n= 75 [64.1%]), recruited both male and female participants (n=81 [69.2%]), and were from the Eastern Africa region (n=57 [48.7%]) (Table 1). The most reported SRTB outcome was non-condom use (n=93 [79.5%]). Overall, 36 (30.7%) studies reported SRTB outcomes and their variants. Based on the QATSO, a majority of studies had a good quality score (n=91 [77.8%]) (Table 2).

195 **Fig 1: PRISMA flow chart illustrating how number of articles included in analysis was arrived at**

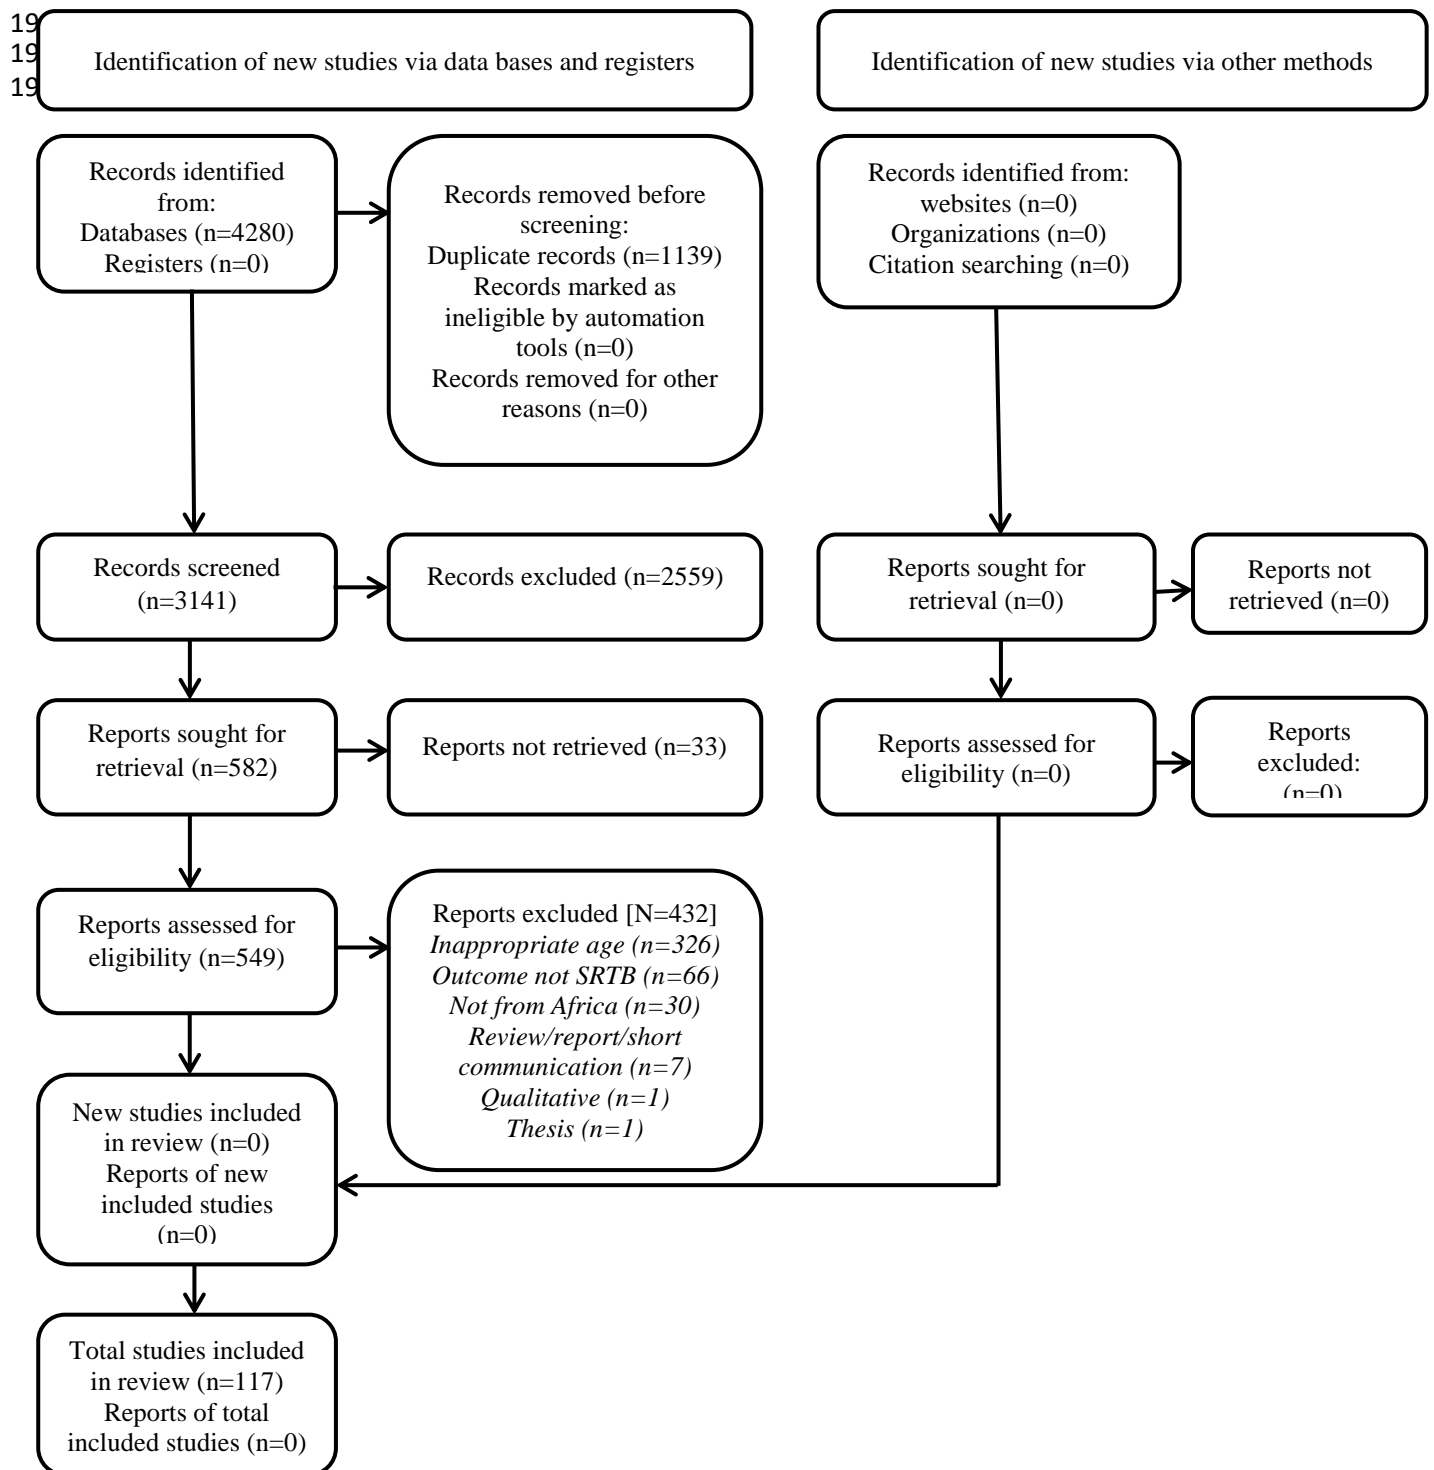

**Table 1: Description of studies included in the analysis by year of publication, study design, African region in which individual studies were conducted, sample size and sex of study participants (n=117)**

|                        | Non-condom use<br>(n=93) | Multiple sex<br>partners (n=69) | Transactional<br>sex (n=31) | Younger age at<br>sexual debut<br>(n=31) | Concurrency<br>(n=13) | Age-disparate<br>relationship<br>(n=12) | Study-defined<br>SRTB (n=14) | Overall (N=117) |
|------------------------|--------------------------|---------------------------------|-----------------------------|------------------------------------------|-----------------------|-----------------------------------------|------------------------------|-----------------|
| <b>Year</b>            |                          |                                 |                             |                                          |                       |                                         |                              |                 |
| Up to 2009             | 23 (24.7)                | 18 (26.1)                       | 11 (35.5)                   | 5 (16.1)                                 | 2 (15.4)              | 0 (0.0)                                 | 4 (28.6)                     | 28 (23.9)       |
| 2010-2020              | 70 (75.3)                | 51 (73.9)                       | 20 (64.5)                   | 26 (83.9)                                | 11 (84.6)             | 12 (100.0)                              | 10 (71.4)                    | 89 (76.1)       |
| <b>Design</b>          |                          |                                 |                             |                                          |                       |                                         |                              |                 |
| Cross sectional        | 87 (93.5)                | 64 (92.7)                       | 30 (96.8)                   | 30 (96.8)                                | 11 (84.6)             | 11 (91.7)                               | 13 (92.9)                    | 109 (93.2)      |
| Cohort                 | 6 (6.5)                  | 5 (7.3)                         | 1 (3.2)                     | 1 (3.2)                                  | 2 (15.4)              | 1 (8.3)                                 | 1 (7.1)                      | 8 (6.8)         |
| <b>*African Region</b> |                          |                                 |                             |                                          |                       |                                         |                              |                 |
| EA                     | 44 (47.3)                | 35 (50.7)                       | 15 (48.4)                   | 17 (54.8)                                | 4 (30.8)              | 6 (50.0)                                | 7 (50.0)                     | 57 (48.7)       |
| SA                     | 27 (29.0)                | 18 (26.1)                       | 11 (35.5)                   | 6 (19.4)                                 | 6 (46.2)              | 5 (41.7)                                | 5 (35.7)                     | 34 (29.1)       |
| WA/CA/NA               | 21 (22.6)                | 14 (20.3)                       | 5 (16.1)                    | 8 (25.8)                                 | 3 (23.0)              | 1 (8.3)                                 | 2 (14.3)                     | 24 (20.5)       |
| MR                     | 1 (1.1)                  | 2 (2.9)                         | 0 (0)                       | 0 (0)                                    | 0 (0)                 | 0 (0)                                   | 0 (0.0)                      | 2 (1.7)         |
| <b>Sample</b>          |                          |                                 |                             |                                          |                       |                                         |                              |                 |
| Up to 1000             | 62 (66.7)                | 44 (63.8)                       | 23 (74.2)                   | 19 (61.3)                                | 9 (69.2)              | 8 (66.7)                                | 6 (42.9)                     | 75 (64.1)       |
| 1001+                  | 31 (33.3)                | 25 (36.2)                       | 8 (25.8)                    | 12 (38.7)                                | 4 (30.8)              | 4 (33.3)                                | 8 (57.1)                     | 42 (35.9)       |
| <b>Sex</b>             |                          |                                 |                             |                                          |                       |                                         |                              |                 |
| Male & female          | 67 (72.0)                | 56 (81.2)                       | 24 (77.4)                   | 21 (67.7)                                | 6 (46.2)              | 7 (58.3)                                | 13 (92.9)                    | 81 (69.2)       |
| Male only              | 8 (8.6)                  | 3 (4.3)                         | 3 (9.7)                     | 2 (6.5)                                  | 5 (38.4)              | 1 (8.4)                                 | 1 (7.1)                      | 13 (11.1)       |
| Female only            | 18 (19.4)                | 10 (14.5)                       | 4 (12.9)                    | 8 (25.8)                                 | 2 (15.4)              | 4 (33.3)                                | 0 (0.0)                      | 23 (19.7)       |

\*African sub-regions as grouped by United Nations Geo-scheme for Africa to include Eastern Africa (EA), Southern Africa (SA), Western Africa (WA), Central Africa (CA), Northern Africa (NA) and Multiple regions (MR; conducted in several countries belonging to more than one region).

**Table 2: Distribution of studies included in analysis by their quality as assessed using the QUATSO tool (n=117)**

| Quality score (%) | Quality assessment | Number of studies n (%) |
|-------------------|--------------------|-------------------------|
| <33               | Poor               | 6 (5.1)                 |
| 33-66             | Satisfactory       | 20 (17.1)               |
| >66               | Good               | 91 (77.8)               |

## **Pooled prevalence and risk factors of sexual risk-taking behavior**

### **i) Non-condom use**

Overall, 93 (79.5%) studies reported non-condom use, thirty of which comprised a cumulative forty-four sub-variants of the outcome yielding 137 records. Non-condom use at last sexual encounter was the most used definition (n=42 [30.7%]) (S1 Table). The pooled prevalence of non-condom use was 46.0% (95% CI: 41.0-51.0) (A in S1 Fig). There was significant heterogeneity between studies ( $I^2=99.7\%$ ,  $p<0.01$ ), with female-only studies and both-sex studies (compared to male-only studies,  $p=0.04$ ), studies from the Eastern Africa region (compared to other regions,  $p<0.01$ ) and studies published before 2010 (compared to those published after 2010,  $p=0.01$ ) having significantly higher pooled estimates (Table 3 and B, C, D and E in S1 Fig).

Of the 93 studies, 57 (61.2%) assessed risk factors for non-condom use (S2 Table). Of these, 42 reported at least one significant factor associated with non-condom use. Alcohol/illicit drug use was the most common risk factor for non-condom use (n=13 studies) (Table 4).

223 **Table 3: Overall pooled prevalence estimates of the seven SRTB outcomes assessed in the current review as well as pooled estimates by sex of study participants, African region**  
224 **where studies were conducted, year of publication and definition of individual SRTB outcomes in primary studies; and outstanding/frequently reported risk factors and their**  
225 **categories for all outcomes and their variants in the included studies (n=117)**

|                                                               | Non-Condom use (n=93) | Multiple sex partners (n=69) | Transactional sex (n=31) | Younger age at sexual debut (n=31) | Concurrency (n=13) | Age-disparate relationship (n=12) | Study defined SRTB (n=14) |
|---------------------------------------------------------------|-----------------------|------------------------------|--------------------------|------------------------------------|--------------------|-----------------------------------|---------------------------|
| <b>Total records</b>                                          | 137                   | 74                           | 32                       | 31                                 | 13                 | 12                                | 14                        |
| Pooled prevalence, % (95% CI)                                 | 46 (41-51)            | 30 (24-37)                   | 17 (11-24)               | 25 (19-31)                         | 35 (19-53)         | 24 (17-32)                        | 37 (23-51)                |
| Total heterogeneity, % (p value)                              | 99.7 (p<0.01)         | 99.7 (p<0.01)                | 99.2 (p<0.01)            | 99.1 (p<0.01)                      | 99.6 (p<0.01)      | 98.4 (p<0.01)                     | 99.6 (p<0.01)             |
| <b>Sub-group analysis by sex</b>                              |                       |                              |                          |                                    |                    |                                   |                           |
| <i>Both male &amp; female</i>                                 |                       |                              |                          |                                    |                    |                                   |                           |
| Pooled prevalence (%); 95% CI                                 | 47 (41-53)            | 30 (23-37)                   | 13 (7-20)                | 23 (17-29)                         | 24 (17-32)         | 23 (15-32)                        | 39 (25-53)                |
| Heterogeneity (%); p value                                    | 99.7 (p<0.01)         | 99.8 (p<0.01)                | 99.1 (p<0.01)            | 98.9 (p<0.01)                      | 95.7 (p<0.01)      | 98.1 (p<0.01)                     | 99.5 (p<0.01)             |
| <i>Male</i>                                                   |                       |                              |                          |                                    |                    |                                   |                           |
| Pooled prevalence (%); 95% CI                                 | 29 (18-42)            | 40 (3-85)                    | 28 (13-45)               | 29 (26-33)                         | 57 (18-91)         | 3 (1-6) ***                       | 13 (11-14) ***            |
| Heterogeneity (%); p value                                    | 99.2 (p<0.01)         | *                            | *                        | *                                  | 99.8 (p<0.01)      | *                                 | *                         |
| <i>Female</i>                                                 |                       |                              |                          |                                    |                    |                                   |                           |
| Pooled prevalence (%); 95% CI                                 | 47 (39-55)            | 29 (18-41)                   | 32 (16-52)               | 29 (11-51)                         | 16 (12-20)         | 34 (24-45)                        |                           |
| Heterogeneity (%); p value                                    | 99.2 (p<0.01)         | 98.9 (p<0.01)                | 99.0 (p<0.01)            | 99.4 (p<0.01)                      | *                  | 97.1 (p<0.01)                     |                           |
| Heterogeneity between groups (p value)                        | p=0.04                | p=0.91                       | p=0.04                   | p=0.21                             | p=0.02             | p<0.01                            | p<0.01                    |
| <b>Sub-group analysis by region where study was conducted</b> |                       |                              |                          |                                    |                    |                                   |                           |
| <i>Eastern Africa</i>                                         |                       |                              |                          |                                    |                    |                                   |                           |
| Pooled prevalence (%); 95% CI                                 | 49 (43-55)            | 28 (23-34)                   | 14 (8-22)                | 20 (15-25)                         | 49 (14-86)         | 31 (24-38)                        | 30 (18-43)                |
| Heterogeneity (%); p value                                    | 99.4 (p<0.01)         | 98.8 (p<0.01)                | 98.6 (p<0.01)            | 97.4 (p<0.01)                      | 99.8 (p<0.01)      | 95.8 (p<0.01)                     | 99.1 (p<0.01)             |
| <i>Western/Central/Northern Africa</i>                        |                       |                              |                          |                                    |                    |                                   |                           |
| Pooled prevalence (%); 95% CI                                 | 48 (37-59)            | 33 (15-54)                   | 19 (13-25)               | 39 (18-62)                         | 21 (12-31)         | 29 (25-34) ***                    | 39 (37-42)                |
| Heterogeneity (%); p value                                    | 99.7 (p<0.01)         | 99.8 (p<0.01)                | 91.8 (p<0.01)            | 99.5 (p<0.01)                      | *                  | *                                 | *                         |
| <i>Southern Africa</i>                                        |                       |                              |                          |                                    |                    |                                   |                           |
| Pooled prevalence (%); 95% CI                                 | 36 (27-44)            | 33 (24-43)                   | 20 (8-36)                | 24 (14-34)                         | 33 (9-64)          | 16 (7-28)                         | 47 (17-78)                |
| Heterogeneity (%); p value                                    | 99.4 (p<0.01)         | 99.3 (p<0.01)                | 99.6 (p<0.01)            | 99.2 (p<0.01)                      | 99.7 (p<0.01)      | 98.6 (p<0.01)                     | 99.8 (p<0.01)             |
| <i>Multiple regions</i>                                       |                       |                              |                          |                                    |                    |                                   |                           |
| Pooled prevalence (%); 95% CI                                 | 82 (81-83) ***        | 17 (16-17)                   |                          |                                    |                    |                                   |                           |
| Heterogeneity (%); p value                                    | *                     | *                            |                          |                                    |                    |                                   |                           |
| Heterogeneity between groups (p value)                        | p<0.01                | p<0.01                       | p=0.60                   | p=0.19                             | p=0.29             | p=0.10                            | p=0.37                    |
| <b>Sub-group analysis by year of publication</b>              |                       |                              |                          |                                    |                    |                                   |                           |
| <i>Up to 2009</i>                                             |                       |                              |                          |                                    |                    |                                   |                           |
| Pooled prevalence (%); 95% CI                                 | 57 (48-66)            | 27 (19-36)                   | 16 (6-29)                | 17 (13-21)                         | 36 (34-38)         | **                                | 33 (5-70)                 |
| Heterogeneity (%); p value                                    | 99.6 (p<0.01)         | 99.2 (p<0.01)                | 99.5 (p<0.01)            | 94.8 (p<0.01)                      | *                  | **                                | 99.8 (p<0.01)             |
| <i>2010-2020</i>                                              |                       |                              |                          |                                    |                    |                                   |                           |
| Pooled prevalence (%); 95% CI                                 | 43 (37-49)            | 31 (23-40)                   | 17 (10-25)               | 27 (19-35)                         | 33 (16-53)         | **                                | 38 (23-55)                |
| Heterogeneity (%); p value                                    | 99.7 (p<0.01)         | 99.8 (p<0.01)                | 98.9 (p<0.01)            | 99.1 (p<0.01)                      | 99.5 (p<0.01)      | **                                | 99.5 (p<0.01)             |

|                                                 |               |               |               |               |               |               |               |
|-------------------------------------------------|---------------|---------------|---------------|---------------|---------------|---------------|---------------|
| Heterogeneity between groups (p value)          | p=0.01        | p=0.46        | p=0.90        | p=0.02        | p=0.81        | **            | p=0.79        |
| <b>Sub-group analysis by outcome definition</b> |               |               |               |               |               |               |               |
| <i>12 months or less</i>                        |               |               |               |               |               |               |               |
| Pooled prevalence (%); 95% CI                   | 43 (34-53)    | 28 (24-32)    | 20 (9-36)     |               | 47 (22-73)    |               | 28 (11-49)    |
| Heterogeneity (%); p value                      | 99.5 (p<0.01) | 99.1 (p<0.01) | 98.9 (p<0.01) |               | 99.4 (p<0.01) |               | 99.7 (p<0.01) |
| <i>Unspecified recall period</i>                |               |               |               |               |               |               |               |
| Pooled prevalence (%); 95% CI                   | 47 (36-58)    | 42 (25-59)    | 16 (8-25)     |               | 22 (6-44)     |               | 65 (40-86)    |
| Heterogeneity (%); p value                      | 99.7 (p<0.01) | 99.5 (p<0.01) | 99.3 (p<0.01) |               | 99.7 (p<0.01) |               | *             |
| <i>Lifetime/ever</i>                            |               |               |               |               |               |               |               |
| Pooled prevalence (%); 95% CI                   |               | 30 (20-41)    | 13 (4-27)     |               |               |               |               |
| Heterogeneity (%); p value                      |               | 98.4 (p<0.01) | 98.4 (p<0.01) |               |               |               |               |
| <i>Last sex</i>                                 |               |               |               |               |               |               |               |
| Pooled prevalence (%); 95% CI                   | 45 (36-53)    |               |               |               |               |               |               |
| Heterogeneity (%); p value                      | 99.6 (p<0.01) |               |               |               |               |               |               |
| <i>Never/first sex</i>                          |               |               |               |               |               |               |               |
| Pooled prevalence (%); 95% CI                   | 50 (39-61)    |               |               |               |               |               |               |
| Heterogeneity (%); p value                      | 99.5 (p<0.01) |               |               |               |               |               |               |
| <i>First sex before age 18 years</i>            |               |               |               |               |               |               |               |
| Pooled prevalence (%); 95% CI                   |               |               |               | 24 (19-29)    |               |               |               |
| Heterogeneity (%); p value                      |               |               |               | 98.7 (p<0.01) |               |               |               |
| <i>First sex at age 18-20 years</i>             |               |               |               |               |               |               |               |
| Pooled prevalence (%); 95% CI                   |               |               |               | 32 (6-68)     |               |               |               |
| Heterogeneity (%); p value                      |               |               |               | 99.6 (p<0.01) |               |               |               |
| <i>Age difference 4 years or more</i>           |               |               |               |               |               |               |               |
| Pooled prevalence (%); 95% CI                   |               |               |               |               |               | 26 (19-33)    |               |
| Heterogeneity (%); p value                      |               |               |               |               |               | 97.0 (p<0.01) |               |
| <i>Age difference unspecified</i>               |               |               |               |               |               |               |               |
| Pooled prevalence (%); 95% CI                   |               |               |               |               |               | 12 (11-13)    |               |
| Heterogeneity (%); p value                      |               |               |               |               |               | *             |               |
| <i>Lifetime/ever/last sex</i>                   |               |               |               |               |               |               |               |
| Pooled prevalence (%); 95% CI                   |               |               |               |               |               |               | 33 (25-41)    |
| Heterogeneity (%); p value                      |               |               |               |               |               |               | *             |
| Heterogeneity between groups (p value)          | p=0.81        | p=0.29        | p=0.75        | p=0.60        | p=0.14        | p<0.01        | p=0.04        |

226 \*Three or less studies in sub-group hence no heterogeneity estimates

227 \*\*All studies fall in one category hence no sub-groups

228 \*\*\*Prevalence estimate is for one study only since that is the only study in the sub-group

229  
230  
231

**Table 4: Summary of factors reported to be significantly associated with SRTB outcomes in studies included in analysis grouped in five thematic areas derived from a modified socio-ecological model**

|                                  | Non- condom use                                                                                                                                                                                                                                                                                                                                                                                                                                                                                                                                             | Multiple sex partners                                                                                                                                                                                                                                                                                                                                                                                                                                                | Transactional sex                                                                                                                                          | Younger age at sexual debut                                                                                     | Concurrency                                                                                                                                                                                                                                                                                                       | Age-disparate relationships                                                           | Study-defined SRTB                                                                                                                                                                                                                                                                                          |
|----------------------------------|-------------------------------------------------------------------------------------------------------------------------------------------------------------------------------------------------------------------------------------------------------------------------------------------------------------------------------------------------------------------------------------------------------------------------------------------------------------------------------------------------------------------------------------------------------------|----------------------------------------------------------------------------------------------------------------------------------------------------------------------------------------------------------------------------------------------------------------------------------------------------------------------------------------------------------------------------------------------------------------------------------------------------------------------|------------------------------------------------------------------------------------------------------------------------------------------------------------|-----------------------------------------------------------------------------------------------------------------|-------------------------------------------------------------------------------------------------------------------------------------------------------------------------------------------------------------------------------------------------------------------------------------------------------------------|---------------------------------------------------------------------------------------|-------------------------------------------------------------------------------------------------------------------------------------------------------------------------------------------------------------------------------------------------------------------------------------------------------------|
| Socio-demographic factors        | Female gender (n=6); low SES/not participating in savings group (n=5); male gender (n=4); older age (n=4); low education/not schooling/being a 1 <sup>st</sup> yr student (n=4); younger age (n=4); rural residence (n=3); being married (n=2); being single (n=1); poor academic performance (n=1); being Christian (n=1)                                                                                                                                                                                                                                  | Male gender (n=7); older age (n=4); being a Christian/catholic (n=3); female gender (n=2); younger age (n=2); urban residence (n=2); not in school/low education (n=2); being single (n=2); low SES (n=1); belonging to nursing department (n=1); being a 1 <sup>st</sup> year student (n=1)                                                                                                                                                                         | Low education (n=2); low SES (n=2); female gender (n=1); younger age (n=1); male gender (n=1); being married (n=1); rural residence (n=1); older age (n=1) | Low SES (n=2); female gender (n=1); older age (n=1)                                                             | Older age (n=1); male gender (n=1); not having slept at parents' home the previous night (n=1)                                                                                                                                                                                                                    | Being food insecure (n=1); being married (n=1); low SES/poverty (n=1); high SES (n=1) | Older age (n=2); being male (n=2); low education (n=3); urban residence (n=1); being female (n=2); low socioeconomic status (n=1); high SES (n=1); high education (n=1); rural residence (n=1); living in a household at the time of 1 <sup>st</sup> sex (n=1); not attending a religious institution (n=1) |
| Relationship/behavioural factors | Using alcohol/drugs/having alcohol use expectancy (n=13); experiencing physical/sexual violence (n=5); having had sex/sex partner (n=3); having low intention to engage in safe sex (n=2); not talking to partner about condom (n=2); not experienced physical/sexual violence (n=2); watching porn (n=2); having been pregnant (n=1); not using condom at 1 <sup>st</sup> sex (n=1); having a younger partner (n=1); early sex debut (n=1); having had an unstable 1 <sup>st</sup> partner (n=1); late sex debut (n=1); having relationship problems (n=1) | Drug/alcohol use(n=11); sexual/physical violence/abuse experience(n=5); attending night club (n=4); watching porn (n=3); early sex debut (n=2); not discussing/communicating sexuality (n=1); having partner with huge age difference (n=1); travelling for work (n=1); engaging in transactional sex (n=1); not using condom (n=1); using condom (n=1); engaging in theft/vandalism/fighting/gambling (n=1); peer pressure/having friends with sex experience (n=1) | Drug/alcohol use(n=4); perpetrating IPV (n=2); attending night club (n=1); seeking a relationship with a foreigner (n=1)                                   | Drug/alcohol use(n=1); older 1 <sup>st</sup> partner (n=1); 1 <sup>st</sup> sex partner being a boyfriend (n=1) | Having MSPs (n=2); early sex debut (n=2); alcohol/drug use (n=1); perpetrating IPV (n=1); attending 2 or more sex venues (n=1); living in another town/village (n=1); having a casual/unstable relationship (n=1); having sex frequently; not using condom (n=1); meeting at least 1 sex partner at a venue (n=1) | Nil                                                                                   | Alcohol/drug use (n=5); having relationship problems (n=1); high peer pressure (n=1); watching porn (n=1)                                                                                                                                                                                                   |



|                                      |                                                                                                                                                                                                                                                                                                                                                                                                                                                                                                                                              |                                                                                                                                                                                                                                                                                    |                                                                                |                                                                                                                                                                                                                                                                    |                                                                                                                         |     |                                                                                                                                                                                                                                                                                                                                                                                                                |
|--------------------------------------|----------------------------------------------------------------------------------------------------------------------------------------------------------------------------------------------------------------------------------------------------------------------------------------------------------------------------------------------------------------------------------------------------------------------------------------------------------------------------------------------------------------------------------------------|------------------------------------------------------------------------------------------------------------------------------------------------------------------------------------------------------------------------------------------------------------------------------------|--------------------------------------------------------------------------------|--------------------------------------------------------------------------------------------------------------------------------------------------------------------------------------------------------------------------------------------------------------------|-------------------------------------------------------------------------------------------------------------------------|-----|----------------------------------------------------------------------------------------------------------------------------------------------------------------------------------------------------------------------------------------------------------------------------------------------------------------------------------------------------------------------------------------------------------------|
| Knowledge, attitude & belief factors | Having false beliefs about condom and HIV (n=3); low knowledge of HIV transmission/low HIV literacy (n=2); believing that partner/close family member hates condom (n=2); not knowing one's HIV status (n=2); low HIV risk perception (n=1); having conservative attitude about gender relations (n=1); approving IPV (n=1); not knowing where to get condom (n=1); low partner risk reduction self-efficacy (n=1); believing that condom prevents HIV (n=1); getting HIV info from friends (n=1); feeling at risk of getting pregnant (n=1) | Not knowing partner HIV status (n=1)                                                                                                                                                                                                                                               | Perceiving oneself to be fashionable (n=1)                                     | Nil                                                                                                                                                                                                                                                                | Having more equitable gender norms (n=2); having gender role conflict (n=1)                                             | Nil | Paying no attention to HIV risk/low risk perception (n=1); believing that one is at risk of getting pregnant (n=1); believing that one is at risk of getting HIV (n=1); believing that sexual partner hates condom (n=1); believing that one can take care of HIV+ people without worries (n=1); believing that condom prevents HIV (n=1); getting HIV info from friends (n=1); not being tested for HIV (n=1) |
| Family & community factors           | Low social participation/not belonging to a social network (n=2); household with few residents/having no dependants (n=2); having had caring caregivers while young (n=1); parent with more years of education (n=1)                                                                                                                                                                                                                                                                                                                         | Low family/community connectedness/parental monitoring/low quality of parent-child relationship (n=2); living with a single mother (n=1); living with grandparent (n=1); living alone (n=1); parents divorced (n=1); not belonging to a social network (n=1); being orphaned (n=1) | Low family connectedness/support/not receiving pocket money from parents (n=1) | Not having a close friend/not belonging to a social network (n=2); not residing with parents (n=1); having moved from an area severally (n=1); living with both parents (n=1); having had caring caregivers at young age (n=1); being from a well-off family (n=1) | Being close to social camps (n=1); camp viewing concurrency as normative behaviour (n=1); living with father only (n=1) | Nil | Living with single parent (n=1); living away from family (n=1); not having marital relationship with household head (n=1); not having family connectedness (n=1); having legal problems (n=1); having serious injury (n=1); being a crime victim (n=1); high household SES (n=1); low household SES (n=1)                                                                                                      |
| Mental/physical health factors       | Few VCT counselors in facility (n=1); using private health facility (n=1); having STI (n=1)                                                                                                                                                                                                                                                                                                                                                                                                                                                  | Having STIs (n=2); having depression (n=2); not using ARV (n=1); having anxiety (n=1); having psychosis (n=1); having disability (n=1)                                                                                                                                             | Nil                                                                            | Nil                                                                                                                                                                                                                                                                | Nil                                                                                                                     | Nil | Nil                                                                                                                                                                                                                                                                                                                                                                                                            |

## ii) Multiple sex partnerships (MSP)

Overall, 69 (59.0%) studies reported MSP, five of which included sub-variants of the outcome yielding 74 records. The majority of studies (n=57 [77.0%]) defined the outcome as having MSP in the last 12 months or less (S1 Table). The pooled prevalence of MSP was 30.0% (95% CI: 24.0-37.0) (A in S2 Fig). There was significant heterogeneity between studies ( $I^2=99.7\%$ ,  $p<0.01$ ), with studies from both the Western Africa/Central Africa/Northern Africa (WA/CA/NA) and Southern Africa (SA) regions having equal and significantly higher pooled prevalence estimates compared to the other regions ( $p=0.01$ ) (Table 3 and B, C, D and E in S2 Fig).

Of the 69 studies, 35 (50.7%) assessed risk factors for MSP (S2 Table). Of these, 27 reported at least one significant factor associated with MSP. Alcohol/illicit drug use was the most common risk factor for MSP (n=11 studies) (Table 4).

## iii) Transactional sex (TS)

Overall, 31 (26.5%) studies reported TS, one of which included a sub-variant of the outcome yielding 32 records. The majority of studies (n=18 [56.3%]) defined TS without including a recall period (S1 Table). The pooled prevalence of TS was 17.0% (95% CI: 11.0-24.0) (A in S3 Fig). There was significant heterogeneity between studies ( $I^2=99.2\%$ ,  $p<0.01$ ), with female-only studies (compared to male-only studies and both-sex studies,  $p=0.04$ ) having significantly higher prevalence estimates (Table 3 and B, C, D and E in S3 Fig).

Of the 31 studies, 12 (38.7%) assessed risk factors for TS (S2 Table). Of these, 11 reported at least one significant factor associated with TS. Alcohol/illicit drug use was the most common risk factor for TS (n=4 studies) (Table 4).

## iv) Younger age at sexual debut (YASD)

Overall, 31 (26.5%) studies reported YASD. None included a sub-variant of the outcome. The majority of studies (n=26 [83.9%]) defined YASD as having first sex before the age of 18 years

(S1 Table). The pooled prevalence of YASD was 25.0% (95% CI: 19.0-31.0) (A in S4 Fig). There was significant heterogeneity between studies ( $I^2=99.1\%$ ,  $p<0.01$ ), with studies published after 2010 having higher pooled prevalence estimate, compared to those published prior 2010 ( $p=0.02$ ) (Table 3 and B, C, D and E in S4 Fig). Of the 31 studies, 10 (32.2%) assessed risk factors for YASD (S2 Table). Of these, 6 reported at least one significant factor associated with YASD. Low socioeconomic status and not belonging to a social network were the two outstanding risk factors for YASD ( $n=2$  studies each) (Table 4).

## **v) Concurrency**

Overall, 13 (11.1%) studies reported concurrency. None included a sub-variant of the outcome, yielding 13 records. The majority of studies defined concurrency as having concurrent sexual partners in the last 12 months or less ( $n=7$  [53.9%]) (S1 Table). The pooled prevalence of concurrency was 35.0% (95% CI: 19.0-53.0) (A in S5 Fig). There was significant heterogeneity between studies ( $I^2=99.6\%$ ,  $p<0.01$ ), with male-exclusive studies (compared to female-exclusive studies and both-sex studies,  $p<0.02$ ) having higher pooled estimates (Table 3 and B, C, D and E in S5 Fig).

Of the 13 studies, 9 (69.2%) assessed risk factors for concurrency (S2 Table). Of these, 7 reported at least one significant factor associated with concurrency. Having multiple sex partners, younger age at sexual debut and having equitable gender norms were standing out as risk factors for concurrency, ( $n=2$  studies each) (Table 4).

## **vi) Age-disparate relationships**

Overall, 12 (10.2%) studies reported age-disparate relationships. None included a sub-variant of the outcome, yielding 12 records. The majority of studies defined age-disparate relationships as an age difference of four years or more between sexual partners ( $n=10$  [83.3%]) (S1 Table). The pooled prevalence of age-disparate relationships was 24.0% (95% CI: 17.0-32.0) (A in S6

Fig). There was significant heterogeneity between studies ( $I^2=98.4\%$ ,  $p<0.01$ ), with female-exclusive studies (compared to male-exclusive studies and both-sex studies,  $p<0.01$ ) and studies using definition of age difference of four or more years between sexual partners (compared to studies not specifying an age difference between sexual partners,  $p<0.01$ ) having higher pooled prevalence estimates (Table 3 and B, C, D and E in S6 Fig).

Of the 12 studies, only 3 (25.0%) assessed risk factors for age-disparate relationships (S2 Table). Of these, two reported at least one significant factor associated with age-disparate relationships. Being food insecure, being married, low socio-economic status and high socioeconomic status were each reported to be significantly associated with age-disparate relationships ( $n=1$  study each).

## **vii) Study-defined SRTB**

Overall, 14 (11.9%) studies reported study-defined SRTB. None included a sub-variant of the outcome, yielding 14 records. The majority of studies defined the outcome as engaging in SRTB in the last 12 months or less ( $n=8$  [57.2%]) (S1 Table). The pooled prevalence of study-defined SRTB was 37.0% (95%CI: 23.0- 51.0) (A in S7 Fig). There was significant heterogeneity between studies ( $I^2=99.6\%$ ,  $p<0.01$ ), with both-sex studies (compared to male-exclusive studies,  $p<0.01$ ) and studies defining SRTB with no recall period (compared to studies defining study-defined SRTB with a recall period of 12 months or less and those defining it as study-defined SRTB in life-time,  $p=0.04$ ) having higher pooled prevalence estimates (Table 3 and B, C, D and E in S7 Fig).

Of the 14 studies, 13 (92.8%) assessed risk factors for study-defined SRTB (S2 Table). Of these, 9 reported at least one significant factor associated with study-defined SRTB. Alcohol/illicit drug use was the most common risk factor for study-defined SRTB ( $n=5$  studies) (Table 4).

## Discussion

Estimates of SRTB are varied in literature. We aimed to systematically review and summarize prevalence and risk factors of SRTB among EmA in Africa. Consistent with previous reviews from Africa, our overall findings suggest that SRTB in Africa is common, ranging from about one in every five (transactional sex) to one in every two (non-condom use) EmA engaging in some form of SRTB.

Our findings demonstrate that non-condom use was the most assessed SRTB. This is likely because it has strongly been associated with HIV and other sexually transmitted infections (1) and has been reported to be prevalent in populations. Indeed, we observed that about one in two EmA reported non-condom use. Our estimate is comparable to the 35.0-89.0% prevalence range reported in reviews of studies among adolescents and young adults from sSA [16, 17], but much higher than the 27.5% reported among adolescents from the United States [27] and the 33% reported among female undergraduate students from Vietnam [28].

Our review also observed that about one in three EmA from Africa engaged in MSP. While this may generally be considered high, the estimate is indeed comparable to other reviews summarizing literature from adolescents and young adults in Africa reporting MSP estimates ranging from 2.5-88.2% [16, 17]. Further, these are also consistent with the 26.0-31.4% estimates among adolescents and young adults from the US [29, 30], suggesting that the burden of MSP among EmA in Africa may be comparable to that from non-African settings.

We also observed that about one in six EmA from Africa reported TS. While this may be considered comparable to another review reporting a pooled prevalence of 20.1% among HIV-infected adolescents in sSA [31], the combined estimates are much lower compared to the 20.6-60.0% range reported in another review involving HIV-infected adolescents aged 10-24 years from sSA [16]. Further, a study of HIV-infected adolescents and young men who have sex with men (MSM) from the USA reported a 27.8% prevalence of TS [32] which is higher than our

estimate. The distinct difference in estimates reported in the three reviews from sSA and the US study may be a reflection of the complexities involved in the definition of TS in different African contexts [16] and may warrant development and validation of a standardized and context relevant approach in the definition of TS in Africa.

Our findings also suggest that one in four EmA in Africa initiate sex at a younger age, with most studies using less than 18 years old as YASD. On the one hand, our estimate is comparatively lower compared to the 25.5-42.1% range reported from another review involving studies among HIV-infected adolescents aged 10-19 years from sSA [31]. The higher estimate reported in the latter review may be attributed to the inclusion of studies involving younger (10-19 years), which is therefore inherently more likely to bias the estimate on the higher side, compared to our inclusion of EmA aged 18-25 years. On the other hand, our estimate is comparatively higher compared to the 10% reported from another review involving studies among HIV-infected adolescents age 10-19 years from sSA [17]. The lower estimate in the latter review may be attributed to the inclusion of HIV- infected adolescents. By virtue of their HIV infection status, this population is likely to delay sexual debut, as has been reported elsewhere [33]. Further, studies from the USA report YASD estimates ranging from 16.0-28.0% [27, 34], which is consistent to our findings and suggest that YASD is common and comparable across the two regions.

We also observed that about one in three EmA in Africa engage in concurrent sexual relationships. To our knowledge, we could not find a systematic review of literature on concurrency amongst adolescents and young adults in Africa. A study from the USA among African American adolescent females aged 15-21 years reported a concurrency prevalence of 23.3% [30], which is comparatively lower compared to our estimate. Combined, these estimates may suggest that concurrency is much more common in the African setting, which may be attributed to low socio-economic status that forces EmA to have concurrent sexual

partners for material gain. Indeed, our review shows that engaging in casual sex for monetary gain stood out as a risk factor for concurrency[35].

We also reported that about one in four EmA in Africa engaged in age-disparate relationships, with most studies defining this as an age difference of more than four years between sexual partners. Our estimate was comparable to the range of 4.0-65.7% prevalence reported from a review of studies among HIV-infected adolescents aged 10-24 years from Africa [16], but higher compared to the range of 10-17% prevalence reported in three studies among adolescents and young adults from the USA [36-38]. The higher prevalence of age-disparate relationships among EmA from Africa may be explained by the low socio-economic status in the African context, with adolescents and younger adults, mostly from disadvantaged backgrounds, engaging in relationships with older, more established partners for material gains, as has been reported elsewhere [39]. Indeed, and in our findings, low socio-economic status stood out as a risk factor for age-disparate relationships [3, 40].

There was significant between-studies heterogeneity in the prevalence estimates across all seven SRTB outcomes. Most heterogeneity was partially explained by variations from sex, with female participants having higher pooled prevalence in four of the seven outcomes, compared to their male counterparts. Differences in the way emerging female adults are socialized in the African context may have impacted on their increased SRTB [39, 41]. In addition, low socio-economic status, along with cultural practices like child marriage and coercion of young girls into early sexual activities with adults are common and may have led to increased SRTB among emerging female adults [39].

Further, alcohol/illicit drug use stood out as the most common risk factor in four of the seven outcomes. Alcohol/illicit drug use among EmA in African settings is common. Indeed, a review of studies among 15–24-year-olds in Eastern Africa reported 52.0% median prevalence of ever using alcohol [42], with some groups like university students reporting up to 89.0% prevalence

of alcohol/illicit drug use [42]. Alcohol/substance use is known to impair inhibitory control [43] and is therefore not surprising that this leads to increased SRTB [43].

A major strength of our review is the inclusion of multiple SRTBs. However, our findings are not without limitations. First, SRTB outcomes were self-reported in most of the eligible studies, which may have led to an over- or underestimation of outcomes. However, use of Audio Computer-Assisted Interview (ACASI) for data collection in some of the studies may have reduced reporting bias [44]. Second, all eligible studies were included in the review regardless of their quality. Inclusion of low-quality studies may raise concerns on the rigor of our SRTB estimates. However, only a small proportion of the studies (5.1%) were of low quality, and this is unlikely to have had a significant impact on the overall findings. Last, the majority (93%) of studies included in the review were cross-sectional in design, which makes it impossible to determine directionality of associations for risk factors. However, this was beyond the scope of the current review. Still, the paucity of longitudinal SRTB studies warrants more rigorous longitudinal studies to better understand causal pathways and direction of association for risk factors among EmA in Africa.

## Conclusion and recommendations

Overall, our findings suggest that SRTB among EmA is common in the African setting. Non-condom use was most frequently assessed and had the highest, while transactional sex had the lowest pooled prevalence estimate. There was significant between-studies heterogeneity in the pooled prevalence estimates, with female participants tending to have higher SRTB estimates than their male counterparts. Alcohol/illicit drug use stood out as the most associated risk factor for SRTB. Interventions targeting emerging female adults' alcohol/illicit drug use may reduce SRTB, which may in-turn mitigate propagation of HIV and other STIs amongst EmA in Africa.



## Author contributions

Conceptualization - SC, AH

Data curation – SC, AH, VK

Formal analysis – SC, AH

Funding acquisition – AH, AA

Investigation – SC, VK

Methodology – SC, AH, KM, SA

Project administration – SC, OA

Resources – SA, KM

Supervision – KM, SA, AH, AA, OA

Validation – KM, SA, AH, AA, VK, OA

Visualization – SC, AH

Writing- original draft preparation – SC

Writing – review and editing – KM, SA, AH, AA, VK, OA

## Supporting information

**S1 File. Full search syntax**

**S2 File. PRISM 2009 checklist**

**S1 Table. Definitions of SRTB outcomes as reported in primary studies.** Table showing definitions of the seven SRTB outcomes as reported in the 117 primary studies and their variants summarized and grouped based on recall period.

**S2 Table. Factors assessed for their association with SRTB outcomes.** Table showing Summary of factors assessed for their association with individual SRTB outcomes in studies

included in analysis grouped in five thematic areas derived from a modified socio-ecological model.

**S1 Fig. Forest plots showing pooled prevalence of non-condom use.** (A) Forest plot illustrating pooled prevalence of non-condom use from the 137 records (obtained from 93 studies that assessed non-condom use). (B) Forest plot illustrating pooled prevalence of non-condom use grouped by sex of the study participants. (C) Forest plot illustrating pooled prevalence of non-condom use grouped by the African region in which the primary study was conducted. (D) Forest plot illustrating pooled prevalence of non-condom use grouped by the year of publication of primary studies. (E) Forest plot illustrating pooled prevalence of non-condom use grouped by the definition of non-condom use in primary studies.

**S2 Fig. Forest plots showing pooled prevalence of multiple sex partners.** (A) Forest plot illustrating pooled prevalence of multiple sex partners (MSP) from the 74 records (obtained from 69 studies that assessed MSP). (B) Forest plot illustrating pooled prevalence of MSP from the 74 records grouped by sex of the study participants. (C) Forest plot illustrating pooled prevalence of MSP grouped by the African region in which the primary study was conducted. (D) Forest plot illustrating pooled prevalence of MSP grouped by the year of publication of primary studies. (E) Forest plot illustrating pooled prevalence of MSP grouped by the definition of MSP in primary studies.

**S3 Fig. Forest plots showing pooled prevalence of transactional sex.** (A) Forest plot illustrating pooled prevalence of transactional sex (TS) from the 32 records (obtained from 31 studies that assessed TS). (B) Forest plot illustrating pooled prevalence of TS from the 32 records grouped by sex of the study participants. (C) Forest plot illustrating pooled prevalence of TS grouped by the African region in which the primary study was conducted. (D) Forest plot illustrating pooled prevalence of TS by year of publication of primary studies. (E) Forest plot illustrating pooled prevalence of TS grouped by the definition of TS in primary studies.

**S4 Fig. Forest plots showing pooled prevalence of younger age at sexual debut.** (A) Forest plot illustrating pooled prevalence of younger age at sexual debut (YASD) from the 31 studies that assessed YASD. (B) Forest plot illustrating pooled prevalence of YASD from the 31 studies grouped by sex of the study participants. (C) Forest plot illustrating pooled prevalence of YASD grouped by the African region in which the primary study was conducted. (D) Forest plot illustrating pooled prevalence of YASD grouped by year of publication of primary studies. (E) Forest plot illustrating pooled prevalence of YASD grouped by the definition of YASD in primary studies.

**S5 Fig. Forest plots showing pooled prevalence of concurrency.** (A) Forest plot illustrating pooled prevalence of concurrency from the 13 studies that assessed concurrency. (B) Forest plot illustrating pooled prevalence of concurrency from the 13 studies grouped by sex of the study participants. (C) Forest plot illustrating pooled prevalence of concurrency grouped by the African region in which the primary study was conducted. (D) Forest plot illustrating pooled prevalence of concurrency grouped by year of publication of primary studies. (E) Forest plot illustrating pooled prevalence of concurrency grouped by the definition of concurrency in primary studies.

**S6 Fig. Forest plots showing pooled prevalence of age-disparate relationships.** (A) Forest plot illustrating pooled prevalence of age-disparate relationships from the 12 studies that assessed age-disparate relationships. (B) Forest plot illustrating pooled prevalence of age-disparate relationships from the 12 studies grouped by sex of the study participants. (C) Forest plot illustrating pooled prevalence of age-disparate relationships grouped by the African region in which the primary study was conducted. (D) Forest plot illustrating pooled prevalence of age-disparate relationships grouped by year of publication of primary studies. (E) Forest plot illustrating pooled prevalence of age-disparate relationships grouped by the definition of age-disparate relationships in primary studies.

**S7 Fig. Forest plots showing pooled prevalence of study-defined SRTB.** (A) Forest plot illustrating pooled prevalence of study-defined sexual risk-taking behaviour (SRTB) from the 14 studies that assessed study-defined SRTB. (B) Forest plot illustrating pooled prevalence of study-defined SRTB from the 14 studies grouped by sex of the study participants. (C) Forest plot illustrating pooled prevalence of study-defined SRTB grouped by the African region in which the primary study was conducted. (D) Forest plot illustrating pooled prevalence of study-defined SRTB grouped by year of publication of primary studies. (E) Forest plot illustrating pooled prevalence of study-defined SRTB grouped by the definition of study-defined SRTB in primary studies.

## Conflict of interest

The authors declare that there are no conflicts of interest regarding the publication of this paper.

## Funding

This work was partially funded by the Medical Research Council [Grant number MR/M025454/1] to AA. This award is jointly funded by the UK Medical Research Council (MRC) and the UK Department for International Development (DFID) under MRC/DFID concordant agreement and is also part of the EDCTP2 program supported by the European Union. The authors are also grateful for the support of the Sub-Saharan African Network for TB/HIV-1 Research Excellence (SANTHE), a DELTAS Africa Initiative [grant number DEL-15-006] to AH. The DELTAS Africa Initiative is an independent funding scheme of the African Academy of Sciences (AAS)'s Alliance for Accelerating Excellence in Science in Africa (AESA) and supported by the New Partnership for Africa's Development Planning and Coordinating Agency (NEPAD Agency) with funding from the Wellcome Trust [grant number

107752/Z/15/Z] and the UK government. The funders had no role in study design, data collection and analysis, decision to publish, or preparation of the manuscript.

## Acknowledgement

First, we would like to acknowledge the efforts of the scientists who authored the primary studies included in the current review. This work would not have been possible without their prior work. Secondly, we thank the researchers who availed their research articles upon request after we failed to obtain them in the various data bases. These include Dr. Mary B Adam (AIC Kijabe hospital, Kenya) and Dr. Yuichiro Yahata (Ministry of Health, Labour and Welfare, Japan). Finally, we appreciate Prof Hans Koot (Vrije Universiteit Amsterdam, Netherlands) and Mr. Alex Maina (Centre for Geographic Medicine Research, Kenya Medical Research Institute, Kenya) for their help during formal search for research articles.

## References

1. UNAIDS. UNAIDS DATA 2020. Geneva, Switzerland: United Nations; 2020. <https://www.unaids.org/en/resources/documents/2020/unaids-data>: Accessed 09/04/2022
2. Mhalu A, Leyna GH, Mmbaga EJ. Risky behaviours among young people living with HIV attending care and treatment clinics in Dar Es Salaam, Tanzania: implications for prevention with a positive approach. *J Int AIDS Soc.* 2013;16(1):17342-.
3. Pascoe SJS, Langhaug LF, Mavhu W, Hargreaves J, Jaffar S, Hayes R, et al. Poverty, food insufficiency and HIV infection and sexual behaviour among young rural Zimbabwean women. *PloS one.* 2015;10(1):e0115290-e.
4. Ankunda R ML, Kiwanuka N., Sexual risk related behaviour among youth living with HIV in central Uganda: implications for HIV prevention. *Pan African Medical Journal* 2016; 24:49 doi:1011604/pamj201624496633. 2016.
5. Zango A, Dube K, Kelbert S, Meque I, Cumbe F, Chen PL, et al. Determinants of Prevalent HIV Infection and Late HIV Diagnosis among Young Women with Two or More Sexual Partners in Beira, Mozambique. *PLoS ONE* 8(5): e63427 doi:101371/journalpone0063427. 2013.
6. Santelli JS, Edelstein ZR, Mathur S, Wei Y, Zhang W, Orr MG, et al. Behavioral, biological, and demographic risk and protective factors for new HIV infections among youth in Rakai, Uganda. *J Acquir Immune Defic Syndr* 2013 Jul 1;63(3):393-400 doi: 101097/QAI0b013e3182926795 PMID: 23535293; PMCID: PMC4131841. 2013.
7. Othieno CJ, Okoth R, Peltzer K, Pengpid S, Malla LO. Risky HIV sexual behaviour and depression among University of Nairobi students. *Annals of General Psychiatry.* 2015;14(1):16.
8. Levinson D. The seasons of a man's life. New York 1978.
9. Arnett JJ. Emerging adulthood: A theory of development from the late teens through the twenties. *American Psychologist.* 2000;55(5):469-80.
10. Rindfuss RR. The young adult years: diversity, structural change, and fertility. *Demography* 1991 1991;28(4):493-512.
11. Goldscheider FK, Davanzo J. Semiautonomy and leaving home in early adulthood. University of North Carolina Press; 1986. p. 187-201. accessed
12. Arnett JJ. Young people's conceptions of the transition to adulthood. *Youth & Society.* 1997;29(1):3-23.
13. Valde GA. Identity Closure: A Fifth Identity Status. *The Journal of Genetic Psychology.* 1996;157(3):245-54.
14. Michael RT, John H. Gagnon, Edward O. Laumann, and Gina Kolata. Sex in America, A Definitive Survey: Little, Brown and Company, Inc., Boston; 1994.
15. Arnett JJ. Reckless behaviour in adolescence: a developmental perspective. *Developmental Review,* 12: 339-73. 1992.
16. Toska E, Pantelic M, Meinck F, Keck K, Haghighat R, Cluver L. Sex in the shadow of HIV: A systematic review of prevalence, risk factors, and interventions to reduce sexual risk-taking among HIV-positive adolescents and youth in sub-Saharan Africa. *PLoS One.* 2017;12(6):e0178106.
17. Zgambo M, Kalembo FW, Mbakaya BC. Risky behaviours and their correlates among adolescents living with HIV in sub-Saharan Africa: a systematic review. *Reprod Health.* 2018;15(1):180.

18. Liberati A, Altman DG, Tetzlaff J, Mulrow C, Gotzsche PC, Ioannidis JP, et al. The PRISMA statement for reporting systematic reviews and meta-analyses of studies that evaluate health care interventions: explanation and elaboration. *PLoS Med*. 2009;6(7):e1000100.
19. Page MJ, McKenzie JE, Bossuyt PM, Boutron I, Hoffmann TC, Mulrow CD, et al. The PRISMA 2020 statement: an updated guideline for reporting systematic reviews. *BMJ (Clinical research ed)*. 2021;372:n71.
20. Wong WC, Cheung CS, Hart GJ. Development of a quality assessment tool for systematic reviews of observational studies (QATSO) of HIV prevalence in men having sex with men and associated risk behaviours. *Emerg Themes Epidemiol*. 2008;5:23.
21. Hunter JP, Saratzis A, Sutton AJ, Boucher RH, Sayers RD, Bown MJ. In meta-analyses of proportion studies, funnel plots were found to be an inaccurate method of assessing publication bias. *J Clin Epidemiol* 2014 Aug;67(8):897-903 doi: 101016/j.jclinepi201403003 Epub 2014 Apr 29 PMID: 24794697. 2014.
22. Murray FF, John WT. Transformations Related to the Angular and the Square Root. *The Annals of Mathematical Statistics*. 1950;21(4):607-11.
23. Coburn KM, JL. V. Publication bias as a function of study characteristics. *Psychol Methods* 2015;20(3):310-30.
24. DerSimonian R, Laird N. Meta-analysis in clinical trials. *Control Clin Trials* 1986 Sep;7(3):177-88 doi: 101016/0197-2456(86)90046-2 PMID: 3802833. 1986.
25. Bronfenbrenner. U. *The ecology of human development: Experiments by nature and design*: Harvard University Press. Cambridge, MA: Harvard University Press; 1979.; 1979.
26. Stokols. Translating social ecological theory into guidelines for community health promotion. *Am J Health Promot* 1996 Mar-Apr;10(4):282-98 doi: 104278/0890-1171-104282 PMID: 10159709. 1996.
27. Khurana A, Romer D, Betancourt LM, Brodsky NL, Giannetta JM, Hurt H. Stronger Working Memory Reduces Sexual Risk Taking in Adolescents, Even After Controlling for Parental Influences. *Child Dev*. 2015;86(4):1125-41.
28. Bui TC, Markham CM, Ross MW. Perceived gender inequality, sexual communication self-efficacy, and sexual behaviour among female undergraduate students in the Mekong Delta of Vietnam. *Sex Health* 2012 Sep;9(4):314-22 doi: 101071/SH11067 PMID: 22877589; PMCID: PMC3435105. 2012.
29. Caldeira KM, Arria AM, O'Grady KE, Zarate EM, Vincent KB, Wish ED. Prospective associations between alcohol and drug consumption and risky sex among female college students. *J Alcohol Drug Educ*. 2009;53(2).
30. Seth P, Patel SN, Sales JM, Diclemente RJ, Wingood GM, Rose ES. The Impact of Depressive Symptomatology on Risky Sexual Behavior and Sexual Communication among African American Female Adolescents. *Psychol Health Med*. 2011;16(3):346-56.
31. Ssewanyana D, Mwangala PN, Van BA, Newton CR, Abubakar A. Health Risk Behaviour among Adolescents Living with HIV in Sub-Saharan Africa: A Systematic Review and Meta-Analysis. *Biomed Res Int* 2018 Jan 28;2018:7375831 doi: 101155/2018/7375831 PMID: 29789804; PMCID: PMC5896333. 2018.
32. Philbin MM, Kinnard EN, Tanner AE, Ware S, Chambers BD, Ma A, et al. The Association between Incarceration and Transactional Sex among HIV-infected Young Men Who Have Sex with Men in the United States. *J Urban Health*. 2018;95:576–83.
33. Onsomu EO, Kimani JK, Abuya BA, Arif AA, Moore D, Duren-Winfield V, et al. Delaying sexual debut as a strategy for reducing HIV epidemic in Kenya *African Journal of Reproductive Health*. 2013;17(2).



34. Khurana A, Romer D, Betancourt LM, Brodsky NL, Giannetta JM, Hurt H. Early adolescent sexual debut: the mediating role of working memory ability, sensation seeking, and impulsivity. *Dev Psychol.* 2012;48(5):1416-28.
35. Xu H, Luke N, Zulu EM. Concurrent sexual partnerships among youth in urban Kenya: Prevalence and partnership effects. *Population Studies.* 2010;64(3):247-61.
36. Ryan S, Franzetta K, Manlove JS, Schelar E. Older Sexual Partners During Adolescence: Links to Reproductive Health Outcomes in Young Adulthood. *Perspectives on Sexual and Reproductive Health.* 2008;40(1):17-26.
37. Manlove J, Terry-Humen E, Ikramullah E. Young Teenagers and Older Sexual Partners: Correlates and Consequences for Males and Females. *Perspectives on Sexual and Reproductive Health.* 2006;38(4):197-207.
38. Meier A, Erickson GA, McLaughlin H. Older Sexual Partners and Adolescent Females' Mental Health. *Perspect Sex Reprod Health.* 2016;48(1):25-33.
39. Melesse DY, Cane RM, Mangombe A, Ijadunola MY, Manu A, Bamgboye EA, et al. Inequalities in early marriage, childbearing and sexual debut among adolescents in sub-Saharan Africa. *Reproductive Health.* 2021;18.
40. Masa R, Graham L, Khan Z, Chowa G, Patel L. Food insecurity, sexual risk taking, and sexual victimization in Ghanaian adolescents and young South African adults. *International journal of public health.* 2019;64(2):153-63.
41. Kushal SA, Amin YM, Reza S, Hossain FB, Shawon MSR. Regional and Sex Differences in the Prevalence and Correlates of Early Sexual Initiation Among Adolescents Aged 12-15 Years in 50 Countries. *J Adolesc Health* 2022 Apr;70(4):607-616 doi: 101016/j.jadohealth202110027 Epub 2021 Dec 10 PMID: 34895994. 2022.
42. Francis JM, Grosskurth H, Changalucha J, Kapiga SH, Weiss HA. Systematic review and meta-analysis: prevalence of alcohol use among young people in eastern Africa. *Trop Med Int Health* 2014 Apr;19(4):476-88 doi: 101111/tmi12267 Epub 2014 Jan 31 PMID: 24479379; PMCID: PMC4065366. 2014.
43. Crane CA, Godleski SA, Przybyla SM, Schlauch RC, Testa M. The Proximal Effects of Acute Alcohol Consumption on Male-to-Female Aggression: A Meta-Analytic Review of the Experimental Literature. *Trauma Violence Abuse* 2016 Dec;17(5):520-531 doi: 101177/1524838015584374 Epub 2015 May 24 PMID: 26009568; PMCID: PMC4798910. 2016.
44. Falb K, Tanner S, Asghar K, Souidi S, Mierzwa S, Assazenew A, et al. Implementation of Audio-Computer Assisted Self-Interview (ACASI) among adolescent girls in humanitarian settings: feasibility, acceptability, and lessons learned. *Conflict and Health.* 2017;10(1):32.
